# Supplementary material
Source: PubMed Central journal article supplement (PMC5395304)

358 **FIGURE LEGENDS**

359 **Figure 1: Consort Diagram**

360 On the first day, dosing was initiated with 0.07mg of milk protein. Subjects were required to tolerate  
361 dose #6 (2.1mg) at dosing visit 1 and dose #8 (9mg) by visit 2. Daily home dosing was continued and  
362 subjects returned every 2 weeks for dose escalation for a minimum of 22 and a maximum of 40 weeks.  
363 Subjects were required to reach a minimum maintenance dose of 520mg milk protein (equivalent to  
364 15mL of liquid milk).

365

366 **Figures 2a – 2d: Figures 2a&b: Casein and Beta-lactoglobulin IgG4 Levels:** Casein and beta-  
367 lactoglobulin specific IgG4 levels were measured at baseline and months 4, 16, 22, 28, 30, and 32.  
368 Median values are represented by the blue stars. Significant increases from baseline were detected  
369 within both treatment groups from month 16 onward (all  $P < 0.0001$ ), with no differences seen between  
370 the two groups. **Figures 2c&d: Casein and Beta-lactoglobulin IgG4/IgE Ratio:** The ratio of casein- and  $\beta$ -  
371 lactoglobulin IgG4/IgE was calculated after IgG4 levels were converted from  $\text{mg}_\mu\text{/L}$  to  $\text{ng/mL}$  and IgE  
372 level was converted from  $\text{kU}_\mu\text{/L}$  to  $\text{ng/mL}$  with the formula  $(\text{IgG4} \times 1000) \div (\text{IgE} \times 2.4)$ . Significant  
373 increases from baseline were detected within both treatment groups from month 16 onward (all  
374  $P < 0.0001$ ). The only significant difference between treatment groups was observed at month 4 with  
375 omalizumab subjects exhibiting decreased casein and beta-lactoglobulin IgG4/IgE ratio compared to  
376 placebo subjects.

377

378

379 **Supplemental Figures 1a, 1b & 1c: Milk, Casein, and Beta-lactoglobulin IgE Levels:** Milk, casein, and  
380 beta-lactoglobulin specific IgE levels were measured at baseline and months 4, 16, 22, 28, 30, and 32.  
381 Median values are represented by the blue stars. In the placebo group, after a non-significant increase

382 in milk IgE at month 4, milk and casein IgE levels were significantly reduced at all subsequent time points  
383 and beta-lactoglobulin IgE did not significantly change. In the omalizumab group, milk and casein IgE  
384 were significantly increased at month 4 and reduced at month 32 and beta-lactoglobulin IgE was  
385 significantly increased at month 4 and month 16 compared to baseline. Comparing the treatment  
386 groups, there were significant differences in the change from baseline for milk IgE through month 30, for  
387 casein IgE through month 28 and for beta-lactoglobulin IgE through month 22.

388 **Supplemental Figures 1d & 1e: Casein and  $\beta$ -lactoglobulin IgG Levels:** Casein and  $\beta$ -lactoglobulin  
389 specific IgG levels were measured at baseline and months 4, 16, 22, 28, 30, and 32. Median values are  
390 represented by the blue stars. Significant increases from baseline were detected within both treatment  
391 groups from month 16 onward (all  $P < 0.0001$ ), with no differences seen between the two groups.

392

393 **Supplemental Figure 2: Milk Endpoint Skin Prick Test Titration:** Skin prick test endpoint titrations were  
394 conducted at baseline and months 28 and 32. Both groups exhibited a significant change from baseline  
395 ( $P < 0.0001$  at months 28 and 32) but there was no difference between the groups in change from  
396 baseline at any of the three time points.

397

398 **Supplemental Figure 3: Basophil Activation by Treatment Group:** Basophil activation was assessed at  
399 baseline and months 4, 16, 22, 28, 30, and 32. A repeated measures analysis of percent CD63+ cells over  
400 time through month 32 found a decrease in the omalizumab group compared to the placebo through  
401 month 28, after which values for omalizumab increased until they were similar to placebo at month 32  
402 such that the interaction between treatment and visit was statistically significant (interaction term for  
403 10  $\mu\text{g}/\text{mL}$  milk:  $p < 0.0001$ , interaction term for 1  $\mu\text{g}/\text{mL}$  milk:  $p = 0.009$ ). At the 0.1  $\mu\text{g}/\text{mL}$  milk stimulant  
404 level, similar trends were seen, but the interaction term was not significant; the p-value for the

405 treatment effect was significant ( $p=0.003$ ). At the 0.01  $\mu\text{g}/\text{mL}$  and 0.001  $\mu\text{g}/\text{mL}$  milk stimulant levels, no  
406 statistically significant differences were seen.

## 407 REFERENCES

- 408 1. Boyce JA, Assa'ad A, Burks AW, et al. Guidelines for the Diagnosis and Management of Food  
409 Allergy in the United States: Summary of the NIAID-Sponsored Expert Panel Report. *The Journal of*  
410 *allergy and clinical immunology* 2010;126:1105-18.
- 411 2. Sicherer SH. Epidemiology of food allergy. *The Journal of allergy and clinical immunology*  
412 2011;127:594-602.
- 413 3. Wood RA, Sicherer SH, Vickery BP, et al. The natural history of milk allergy in an observational  
414 cohort. *The Journal of allergy and clinical immunology* 2013;131:805-12.
- 415 4. Skripak JM, Matsui EC, Mudd K, Wood RA. The natural history of IgE-mediated cow's milk  
416 allergy. *The Journal of allergy and clinical immunology* 2007;120:1172-7.
- 417 5. Fleischer DM, Perry TT, Atkins D, et al. Allergic reactions to foods in preschool-aged children in a  
418 prospective observational food allergy study. *Pediatrics* 2012;130:e25-32.
- 419 6. Boyano-Martinez T, Garcia-Ara C, Pedrosa M, Diaz-Pena JM, Quirce S. Accidental allergic  
420 reactions in children allergic to cow's milk proteins. *The Journal of allergy and clinical immunology*  
421 2009;123:883-8.
- 422 7. Skripak JM, Nash SD, Rowley H, et al. A randomized, double-blind, placebo-controlled study of  
423 milk oral immunotherapy for cow's milk allergy. *The Journal of allergy and clinical immunology*  
424 2008;122:1154-60.
- 425 8. Longo G, Barbi E, Berti I, et al. Specific oral tolerance induction in children with very severe cow's  
426 milk-induced reactions. *The Journal of allergy and clinical immunology* 2008;121:343-7.
- 427 9. Meglio P, Giampietro PG, Gianni S, Galli E. Oral desensitization in children with immunoglobulin  
428 E-mediated cow's milk allergy--follow-up at 4 yr and 8 months. *Pediatric allergy and immunology* :  
429 official publication of the European Society of Pediatric Allergy and Immunology 2008;19:412-9.
- 430 10. Keet CA, Frischmeyer-Guerrerio PA, Thyagarajan A, et al. The safety and efficacy of sublingual  
431 and oral immunotherapy for milk allergy. *The Journal of allergy and clinical immunology* 2012;129:448-  
432 55, 55 e1-5.
- 433 11. Staden U, Rolinck-Werninghaus C, Brewe F, Wahn U, Niggemann B, Beyer K. Specific oral  
434 tolerance induction in food allergy in children: efficacy and clinical patterns of reaction. *Allergy*  
435 2007;62:1261-9.
- 436 12. Keet CA, Seopaul S, Knorr S, Narisety S, Skripak J, Wood RA. Long-term follow-up of oral  
437 immunotherapy for cow's milk allergy. *The Journal of allergy and clinical immunology* 2013;132:737-9  
438 e6.
- 439 13. Burks AW, Jones SM, Wood RA, et al. Oral immunotherapy for treatment of egg allergy in  
440 children. *The New England journal of medicine* 2012;367:233-43.
- 441 14. Syed A, Garcia MA, Lyu SC, et al. Peanut oral immunotherapy results in increased antigen-  
442 induced regulatory T-cell function and hypomethylation of forkhead box protein 3 (FOXP3). *The Journal*  
443 *of allergy and clinical immunology* 2014;133:500-10.
- 444 15. Narisety SD, Frischmeyer-Guerrerio PA, Keet CA, et al. A randomized, double-blind, placebo-  
445 controlled pilot study of sublingual versus oral immunotherapy for the treatment of peanut allergy. *The*  
446 *Journal of allergy and clinical immunology* 2014.
- 447 16. Gorelik M, Narisety SD, Guerrerio AL, et al. Suppression of the immunologic response to peanut  
448 during immunotherapy is often transient. *The Journal of allergy and clinical immunology* 2014.

**Supplemental Table 1: Milk OIT Dosing Scheme**

| Dose #              | Dose milk protein (mg) | Dose milk powder (mg) | % Increase per dose | % Increase per day | Cumulative dose milk powder (mg) |
|---------------------|------------------------|-----------------------|---------------------|--------------------|----------------------------------|
| <b>Dose Visit 1</b> |                        |                       |                     |                    |                                  |
| 1                   | 0.07                   | 0.2                   |                     |                    | 0.2                              |
| 2                   | 0.15                   | 0.4                   | 100%                |                    | 0.6                              |
| 3                   | 0.28                   | 0.8                   | 100%                |                    | 1.4                              |
| 4                   | 0.53                   | 1.5                   | 100%                |                    | 2.9                              |
| 5                   | 1.1                    | 3.0                   | 100%                |                    | 5.9                              |
| 6                   | 2.1                    | 6.0                   | 100%                | N/A                | 11.9                             |
| <b>Dose Visit 2</b> |                        |                       |                     |                    |                                  |
| 7                   | 4                      | 12                    | 100%                |                    | 12                               |
| 8                   | 9                      | 25                    | 100%                |                    | 37                               |
| 9                   | 18                     | 50                    | 100%                |                    | 87                               |
| 10                  | 27                     | 75                    | 50%                 | 2566%              | 162                              |
| <b>Dose Visit 3</b> |                        |                       |                     |                    |                                  |
| 11                  | 36                     | 100                   | 25%                 |                    | 100                              |
| 12                  | 44                     | 125                   | 25%                 |                    | 225                              |
| 13                  | 56                     | 156                   | 25%                 |                    | 381                              |
| 14                  | 69                     | 195                   | 25%                 | 668%               | 576                              |
| <b>Dose Visit 4</b> |                        |                       |                     |                    |                                  |
| 15                  | 87                     | 245                   | 25%                 |                    | 245                              |
| 16                  | 109                    | 306                   | 25%                 |                    | 551                              |
| 17                  | 136                    | 383                   | 25%                 |                    | 934                              |
| 18                  | 170                    | 479                   | 25%                 | 625%               | 1413                             |
| <b>Dose Visit 5</b> |                        |                       |                     |                    |                                  |

|                      |      |       |     |      |       |
|----------------------|------|-------|-----|------|-------|
| 19                   | 213  | 599   | 25% |      | 599   |
| 20                   | 267  | 749   | 25% |      | 1348  |
| 21                   | 333  | 936   | 25% |      | 2284  |
| 22                   | 416  | 1170  | 25% | 621% | 3454  |
| <b>Dose Visit 6</b>  |      |       |     |      |       |
| 23                   | 520  | 1463  | 25% |      | 1463  |
| 24                   | 650  | 1829  | 25% | 181% | 3292  |
| <b>Dose Visit 7</b>  |      |       |     |      |       |
| 25                   | 814  | 2286  | 25% |      | 2286  |
| 26                   | 1017 | 2858  | 25% | 181% | 5144  |
| <b>Dose Visit 8</b>  |      |       |     |      |       |
| 27                   | 1352 | 3801  | 33% | 33%  | 3801  |
| <b>Dose Visit 9</b>  |      |       |     |      |       |
| 28                   | 1799 | 5055  | 33% | 33%  | 5055  |
| <b>Dose Visit 10</b> |      |       |     |      |       |
| 29                   | 2392 | 6723  | 33% | 33%  | 6723  |
| <b>Dose Visit 11</b> |      |       |     |      |       |
| 30                   | 2990 | 8404  | 25% | 25%  | 8404  |
| <b>Dose Visit 12</b> |      |       |     |      |       |
| 31                   | 3300 | 9281  | 10% | 10%  | 9281  |
| <b>by Scoop</b>      | 3840 | 10800 | 16% | 16%  | 10800 |

**Supplemental Table 2:** Specific Challenge Outcomes at Baseline, Month 28 and Month 32

|                                                     |                                           |                       | Omalizumab | Placebo | Total   |
|-----------------------------------------------------|-------------------------------------------|-----------------------|------------|---------|---------|
| <b>Successfully Consumed Dose (mg milk protein)</b> | <b>Baseline (2 g OFC)</b>                 | <b>N</b>              | 28         | 29      | 57      |
|                                                     |                                           | <b>Mean</b>           | 75.0       | 118.3   | 97.0    |
|                                                     |                                           | <b>Median</b>         | 20.0       | 10.0    | 20.0    |
|                                                     |                                           | <b>Lower Quartile</b> | 0.0        | 0.0     | 0.0     |
|                                                     |                                           | <b>Upper Quartile</b> | 100.0      | 100.0   | 100.0   |
|                                                     |                                           | <b>StdErr</b>         | 27.2       | 55.5    | 31.1    |
|                                                     |                                           | <b>Min</b>            | 0.0        | 0.0     | 0.0     |
|                                                     |                                           | <b>Max</b>            | 720.0      | 1500.0  | 1500.0  |
|                                                     | <b>Month 28 (10g Desensitization OFC)</b> | <b>N</b>              | 26         | 24      | 50      |
|                                                     |                                           | <b>Mean</b>           | 9653.8     | 9337.5  | 9502.0  |
|                                                     |                                           | <b>Median</b>         | 10000.0    | 10000.0 | 10000.0 |
|                                                     |                                           | <b>Lower Quartile</b> | 10000.0    | 10000.0 | 10000.0 |
|                                                     |                                           | <b>Upper Quartile</b> | 10000.0    | 10000.0 | 10000.0 |
|                                                     |                                           | <b>StdErr</b>         | 239.8      | 338.3   | 203.9   |
|                                                     |                                           | <b>Min</b>            | 5500.0     | 3600.0  | 3600.0  |
|                                                     |                                           | <b>Max</b>            | 10000.0    | 10000.0 | 10000.0 |
|                                                     | <b>Month 32 (10g Tolerance OFC)</b>       | <b>N</b>              | 24         | 20      | 44      |
|                                                     |                                           | <b>Mean</b>           | 7541.7     | 7350.0  | 7454.5  |
|                                                     |                                           | <b>Median</b>         | 10000.0    | 8750.0  | 10000.0 |
|                                                     |                                           | <b>Lower Quartile</b> | 6500.0     | 5500.0  | 5500.0  |

|  |                       | Omalizumab | Placebo | Total   |
|--|-----------------------|------------|---------|---------|
|  | <b>Upper Quartile</b> | 10000.0    | 10000.0 | 10000.0 |
|  | <b>StdErr</b>         | 711.5      | 721.9   | 502.6   |
|  | <b>Min</b>            | 0.0        | 1500.0  | 0.0     |
|  | <b>Max</b>            | 10000.0    | 10000.0 | 10000.0 |

**Supplemental Table 3.** Number of Doses with Dosing Symptoms During Escalation Period

|                                               | <b>Omalizumab</b> |          | <b>Placebo</b> |          |
|-----------------------------------------------|-------------------|----------|----------------|----------|
|                                               | <b>N</b>          | <b>%</b> | <b>N</b>       | <b>%</b> |
| <b>Total # Doses</b>                          | 5226              | 100.0    | 6252           | 100.0    |
| <b>Any Symptoms</b>                           | 442               | 8.5      | 1634           | 26.1     |
| <b>Any Symptoms Excluding Oral/Pharyngeal</b> | 232               | 4.4      | 862            | 13.8     |
| <b>Duration &gt;30 min.</b>                   | 60                | 1.1      | 228            | 3.6      |
| <b>Treatment Used</b>                         | 105               | 2.0      | 293            | 4.7      |
| <b>Oral/Pharyngeal Symptoms</b>               | 320               | 6.1      | 1163           | 18.6     |
| <b>Skin Symptoms</b>                          | 44                | 0.8      | 165            | 2.6      |
| <b>Respiratory Symptoms</b>                   | 92                | 1.8      | 264            | 4.2      |
| <b>GI Symptoms</b>                            | 111               | 2.1      | 386            | 6.2      |
| <b>Other Symptoms</b>                         | 49                | 0.9      | 282            | 4.5      |
| <b>Mild Symptoms</b>                          | 215               | 4.1      | 806            | 12.9     |
| <b>Moderate Symptoms</b>                      | 17                | 0.3      | 55             | 0.9      |
| <b>Severe Symptoms</b>                        | 0                 | 0.0      | 1              | 0.02     |
| <b>Treated with Epinephrine</b>               | 1                 | 0.0      | 8              | 0.1      |



**Supplemental Table 4.** Number of Doses with Dosing Symptoms During Maintenance Period

|                                               | <b>Omalizumab</b> |          | <b>Placebo</b> |          |
|-----------------------------------------------|-------------------|----------|----------------|----------|
|                                               | <b>N</b>          | <b>%</b> | <b>N</b>       | <b>%</b> |
| <b>Total # Doses</b>                          | 15418             | 100.0    | 13745          | 100.0    |
| <b>Any Symptoms</b>                           | 110               | 0.7      | 1983           | 14.4     |
| <b>Any Symptoms Excluding Oral/Pharyngeal</b> | 69                | 0.4      | 926            | 6.7      |
| <b>Duration &gt;30 min.</b>                   | 26                | 0.2      | 234            | 1.7      |
| <b>Treatment Used</b>                         | 26                | 0.2      | 538            | 3.9      |
| <b>Oral/Pharyngeal Symptoms</b>               | 53                | 0.3      | 1278           | 9.3      |
| <b>Skin Symptoms</b>                          | 23                | 0.1      | 265            | 1.9      |
| <b>Respiratory Symptoms</b>                   | 18                | 0.1      | 298            | 2.2      |
| <b>GI Symptoms</b>                            | 26                | 0.2      | 166            | 1.2      |
| <b>Other Symptoms</b>                         | 20                | 0.1      | 432            | 3.1      |
| <b>Mild Symptoms</b>                          | 67                | 0.4      | 902            | 6.6      |
| <b>Moderate Symptoms</b>                      | 2                 | 0.0      | 23             | 0.2      |
| <b>Severe Symptoms</b>                        | 0                 | 0.0      | 1              | 0.01     |
| <b>Treated with Epinephrine</b>               | 1                 | 0.0      | 10             | 0.1      |





**Supplemental Table 7.** Logistic Regression of Baseline Factors Predicting Month 32 Tolerance Success  
After Adjusting for Treatment

| Variable                                   | Wald Chi-square<br>P-value | Odds Ratio | OR Lower CI | OR Upper CI |
|--------------------------------------------|----------------------------|------------|-------------|-------------|
| Gender                                     | 0.722                      | 0.80       | 0.24        | 2.68        |
| Physician Diagnosis Asthma                 | 0.311                      | 0.54       | 0.16        | 1.79        |
| Allergic Rhinitis                          | 0.338                      | 0.54       | 0.15        | 1.91        |
| Atopic Dermatitis                          | 0.292                      | 0.54       | 0.17        | 1.70        |
| Age                                        | 0.987                      | 1.00       | 0.89        | 1.12        |
| Atopic Dermatitis Total Score              | 0.319                      | 1.25       | 0.81        | 1.93        |
| Milk Endpoint Titration SPT                | 0.011                      | 0.90       | 0.83        | 0.98        |
| Milk Skin Prick Test Score                 | 0.012                      | 0.76       | 0.62        | 0.94        |
| OFC Successfully Consumed Dose             | 0.888                      | 1.18       | 0.12        | 11.72       |
| Log <sub>10</sub> Total IgE                | 0.215                      | 2.46       | 0.59        | 10.27       |
| Log <sub>10</sub> Milk IgE                 | 0.007                      | 0.20       | 0.06        | 0.63        |
| Log <sub>10</sub> Casein IgE               | 0.012                      | 0.37       | 0.17        | 0.80        |
| Log <sub>10</sub> β-lactoglobulin IgE      | 0.051                      | 0.46       | 0.21        | 1.00        |
| % Milk IgE                                 | 0.003                      | 0.90       | 0.84        | 0.97        |
| % Casein IgE*                              | 0.005                      | 0.91       | 0.86        | 0.97        |
| % β-lactoglobulin IgE                      | 0.027                      | 0.80       | 0.66        | 0.98        |
| Log <sub>10</sub> Casein IgG               | 0.037                      | 0.16       | 0.03        | 0.89        |
| Log <sub>10</sub> β-lactoglobulin IgG      | 0.114                      | 0.23       | 0.04        | 1.43        |
| Log <sub>10</sub> Casein IgG4              | 0.633                      | 0.77       | 0.27        | 2.22        |
| Log <sub>10</sub> β-lactoglobulin IgG4     | 0.512                      | 0.71       | 0.25        | 1.99        |
| Log <sub>10</sub> Casein IgG4/IgE          | 0.007                      | 3.80       | 1.45        | 9.96        |
| Log <sub>10</sub> β-lactoglobulin IgG4/IgE | 0.058                      | 2.05       | 0.98        | 4.30        |
| %CD63+ Cells: 10 µg/mL Milk                | 0.958                      | 1.00       | 0.98        | 1.02        |

| <b>Variable</b>                | <b>Wald Chi-square<br/>P-value</b> | <b>Odds Ratio</b> | <b>OR Lower CI</b> | <b>OR Upper CI</b> |
|--------------------------------|------------------------------------|-------------------|--------------------|--------------------|
| %CD63+ Cells: 1 µg/mL Milk     | 0.674                              | 0.99              | 0.97               | 1.02               |
| %CD63+ Cells: 0.1 µg/mL Milk   | 0.548                              | 0.99              | 0.96               | 1.02               |
| %CD63+ Cells: 0.01 µg/mL Milk  | 0.296                              | 0.98              | 0.95               | 1.01               |
| %CD63+ Cells: 0.001 µg/mL Milk | 0.416                              | 0.98              | 0.95               | 1.02               |

\* Model has a statistically significant lack of fit at the 0.05 significance level.

**Supplemental Table 8.** Logistic Regression of Month 16 Factors Predicting Month 32 Tolerance Success After Adjusting for Treatment

| <b>Variable</b>                                   | <b>Wald Chi-square<br/>P-value</b> | <b>Odds Ratio</b> | <b>OR Lower CI</b> | <b>OR Upper CI</b> |
|---------------------------------------------------|------------------------------------|-------------------|--------------------|--------------------|
| Log <sub>10</sub> Milk IgE                        | 0.005                              | 0.09              | 0.02               | 0.48               |
| Log <sub>10</sub> Casein IgE                      | 0.012                              | 0.28              | 0.11               | 0.75               |
| Log <sub>10</sub> $\beta$ -lactoglobulin IgE      | 0.010                              | 0.31              | 0.12               | 0.75               |
| Log <sub>10</sub> Casein IgG                      | 0.026                              | 0.31              | 0.11               | 0.87               |
| Log <sub>10</sub> $\beta$ -lactoglobulin IgG      | 0.038                              | 0.36              | 0.14               | 0.94               |
| Log <sub>10</sub> Casein IgG4                     | 0.134                              | 0.60              | 0.30               | 1.17               |
| Log <sub>10</sub> $\beta$ -lactoglobulin IgG4*    | 0.130                              | 0.59              | 0.30               | 1.17               |
| Log <sub>10</sub> Casein IgG4/IgE                 | 0.061                              | 1.72              | 0.98               | 3.03               |
| Log <sub>10</sub> $\beta$ -lactoglobulin IgG4/IgE | 0.066                              | 1.74              | 0.96               | 3.16               |
| %CD63+ Cells: 10 $\mu$ g/mL Milk                  | 0.542                              | 1.01              | 0.99               | 1.03               |
| %CD63+ Cells: 1 $\mu$ g/mL Milk                   | 0.472                              | 1.01              | 0.98               | 1.04               |
| %CD63+ Cells: 0.1 $\mu$ g/mL Milk                 | 0.577                              | 1.01              | 0.97               | 1.05               |
| %CD63+ Cells: 0.01 $\mu$ g/mL Milk                | 0.445                              | 1.02              | 0.97               | 1.06               |
| %CD63+ Cells: 0.001 $\mu$ g/mL Milk               | 0.120                              | 1.15              | 0.96               | 1.36               |

\* Model has a statistically significant lack of fit at the 0.05 significance level.

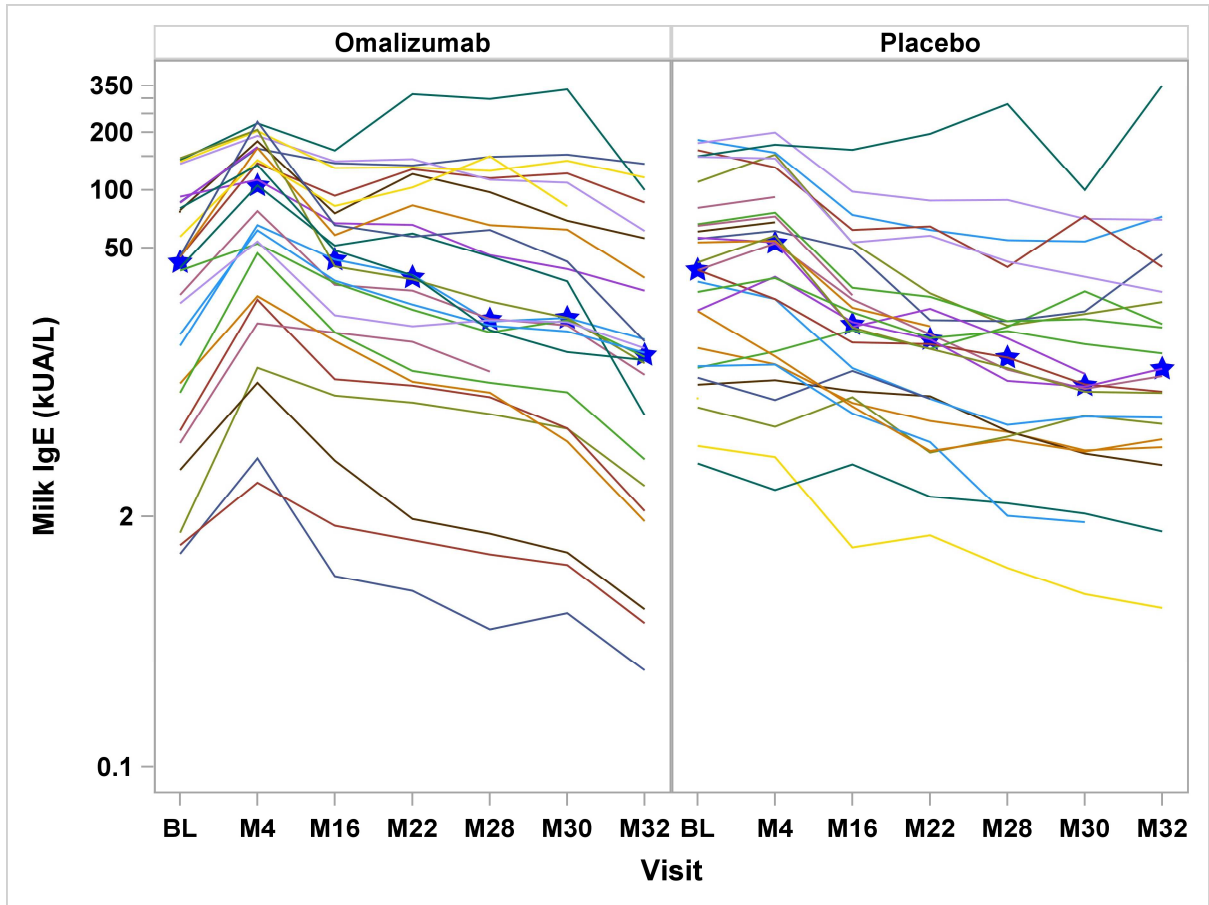

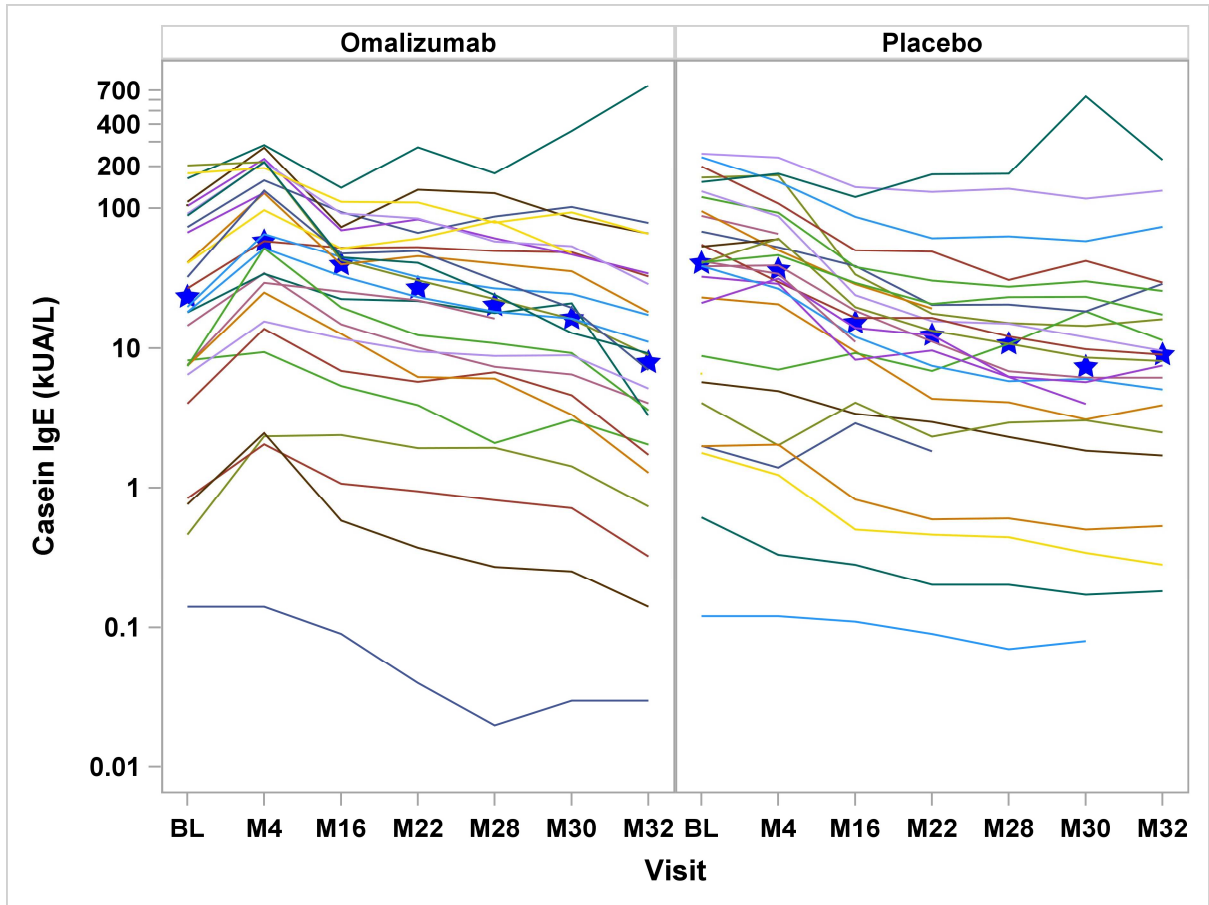



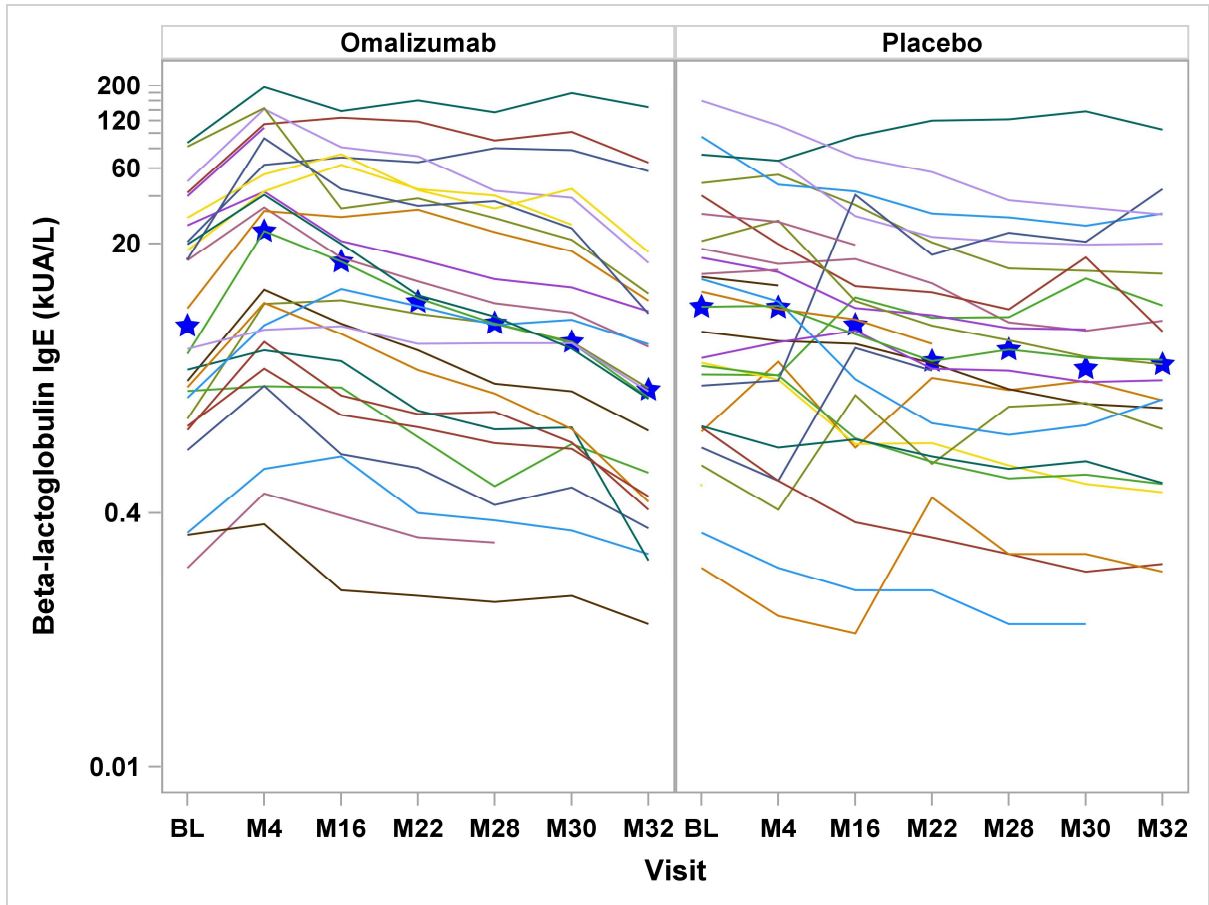

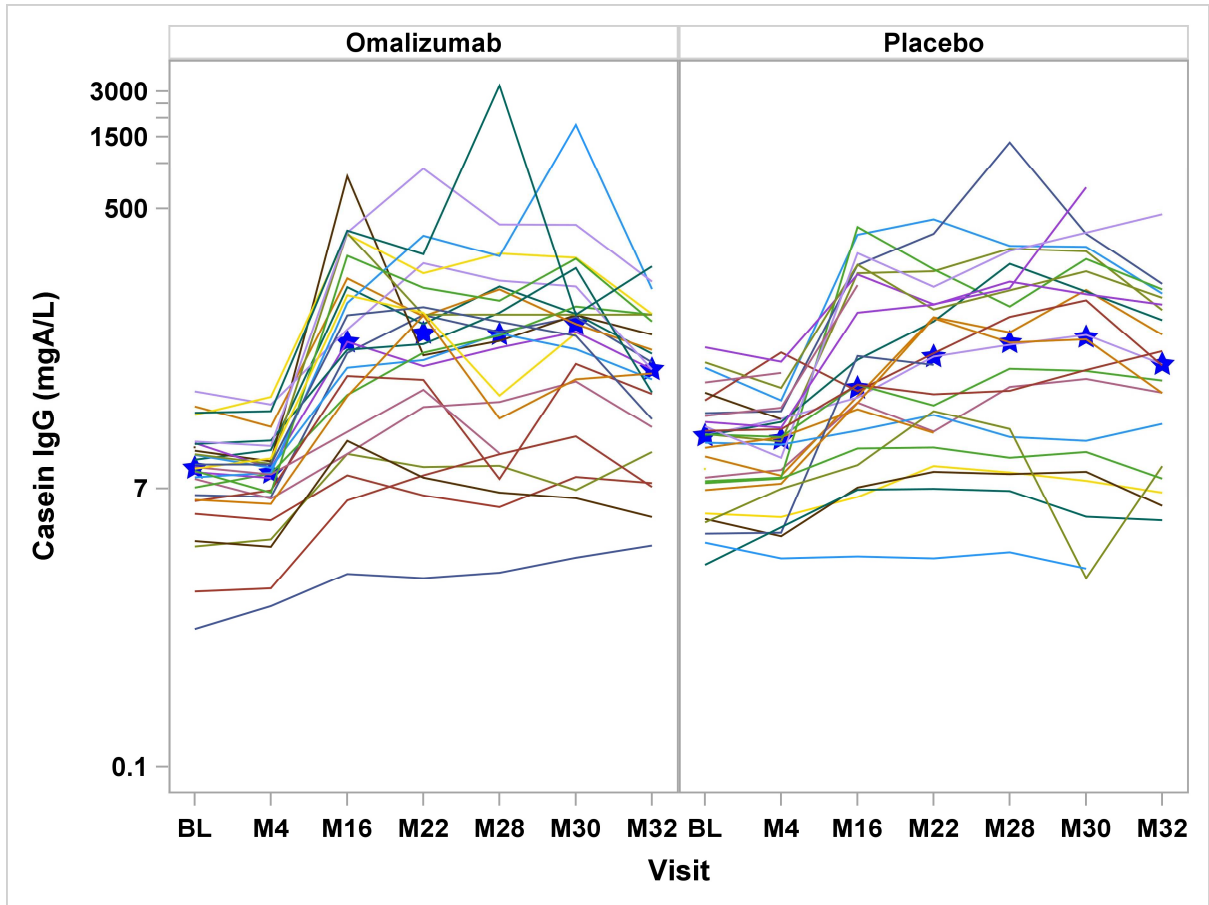

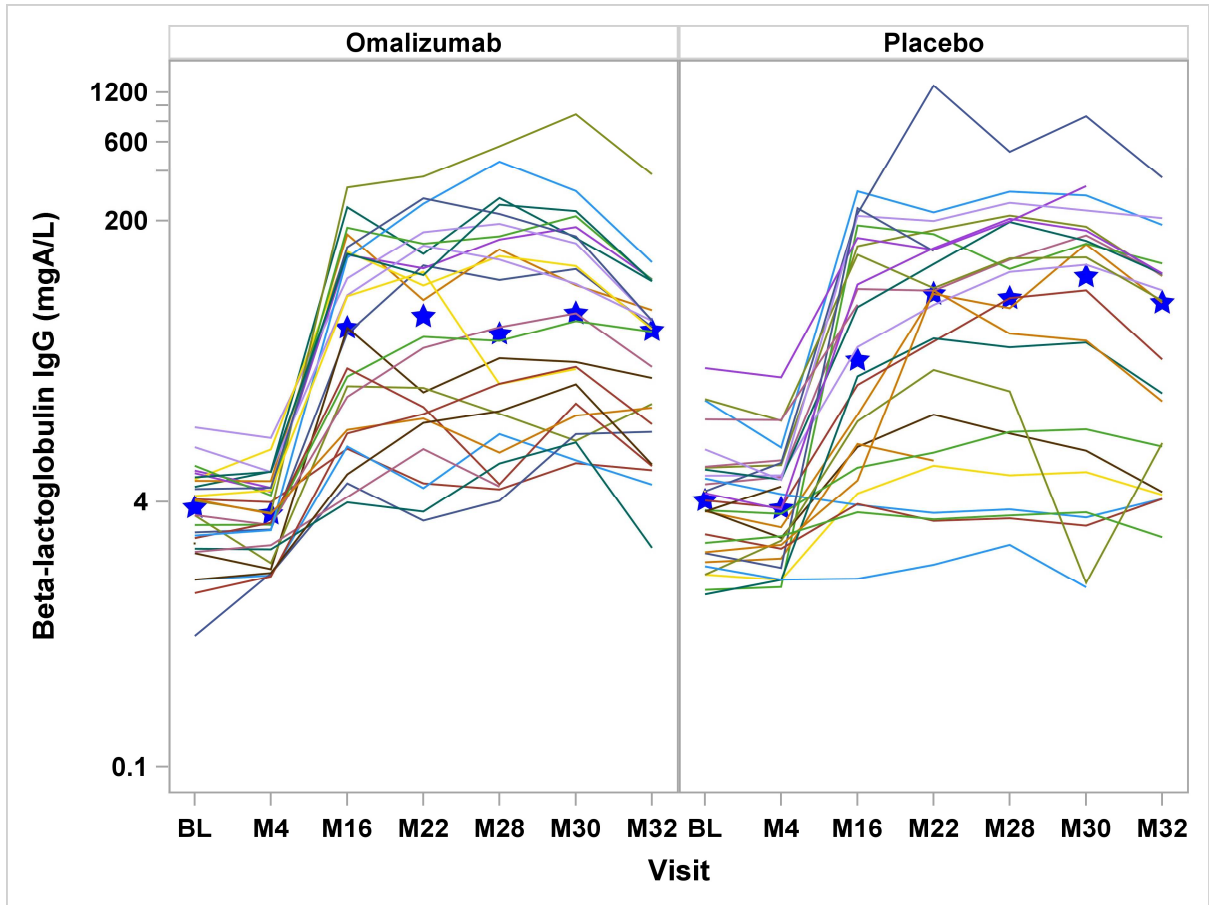

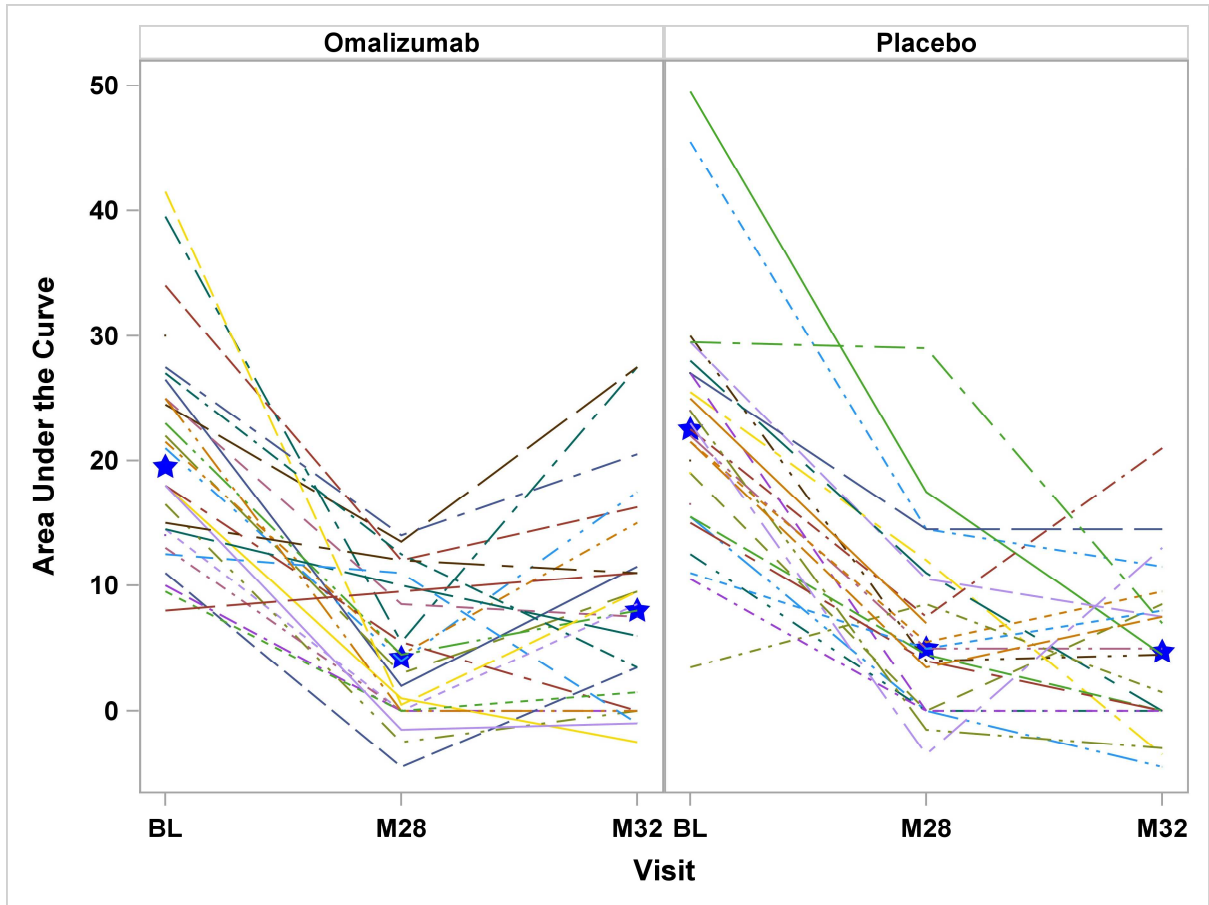

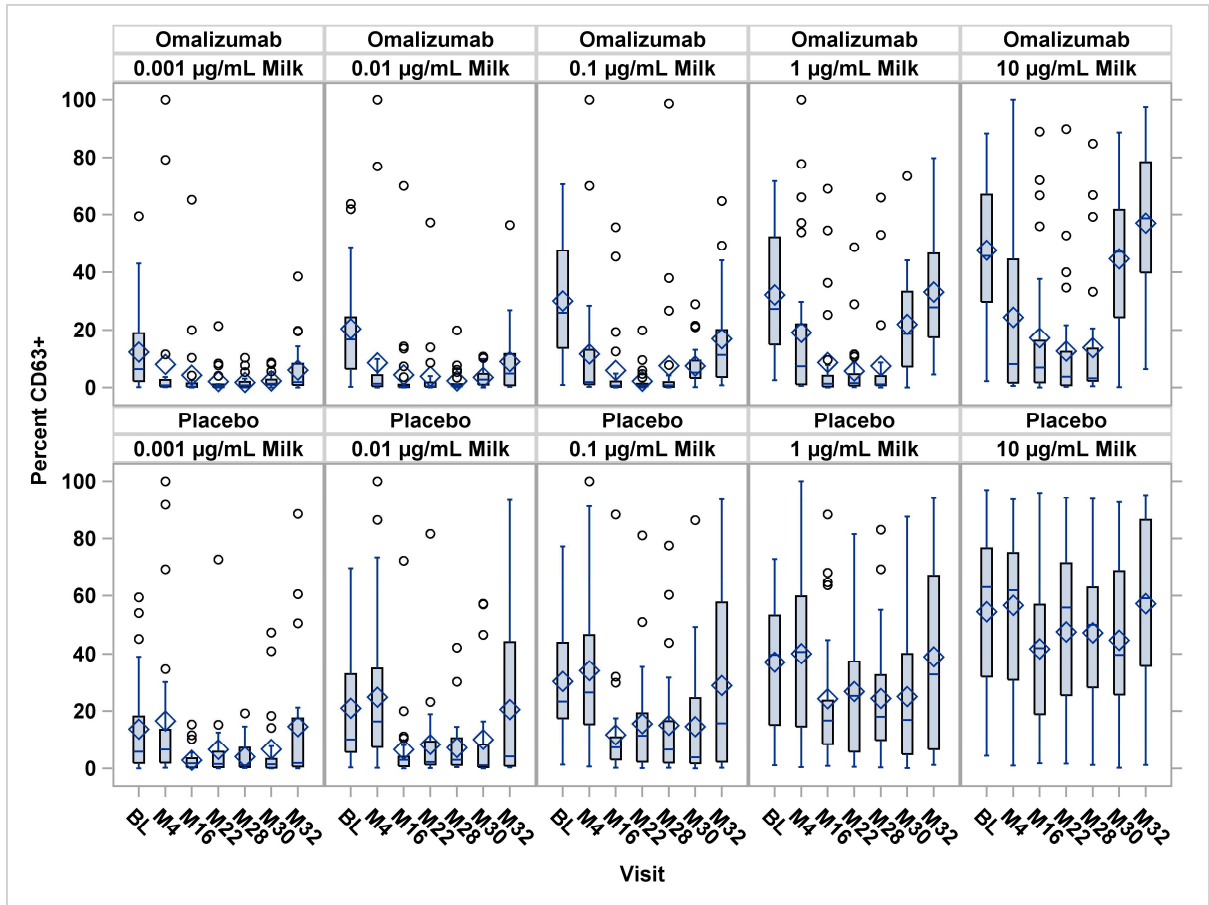

Supplement: NIHMS851878-supplement-supplement_1.pdf [file NIHMS851878-supplement-supplement_1.pdf]
